# Supplementary material for: Generation of wheat gluten hydrolysates with dipeptidyl peptidase IV (DPP-IV) inhibitory properties
Source: Royal Society of Chemistry journal article supplement (doi:10.1039/c7fo00165g), 2017-01-01
Supplement: c7fo00165g1.pdf [file c7fo00165g1.pdf]

Supplementary data

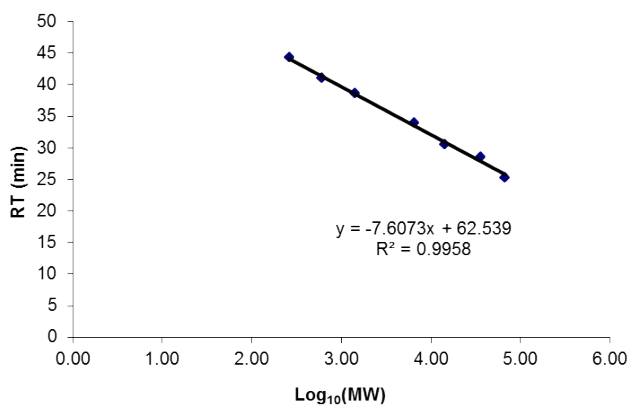

**Supplementary Figure S1.** Calibration curve for the gel permeation high performance liquid chromatography (GP-HPLC) method representing the retention time (RT) as a function of the logarithm of the molecular weight (MW) of the standards (i.e., bovine serum albumin,  $\beta$ -Lactoglobulin,  $\alpha$ -Lactalbumin, aprotinin, bacitracin, Leu-Trp-Met-Arg and Asp-Glu).

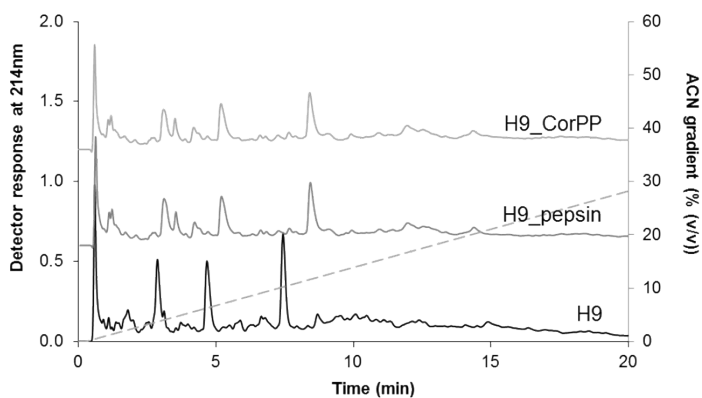

**Supplementary Figure 2.** Reverse-phase ultra-performance liquid chromatography (RP-UPLC) profile of H9, H9 digested with pepsin (H9\_pepsin) and H9\_pepsin digested with Corolase PP (H9\_CorPP). ACN: acetonitrile.
